# Supplementary material
Source: PubMed Central journal article supplement (PMC4930088)

# Supplementary Figure 1

Map of the Slovakia with indicated occurrence of founder effect of c.1013\_1014delTG in *ABCC2*

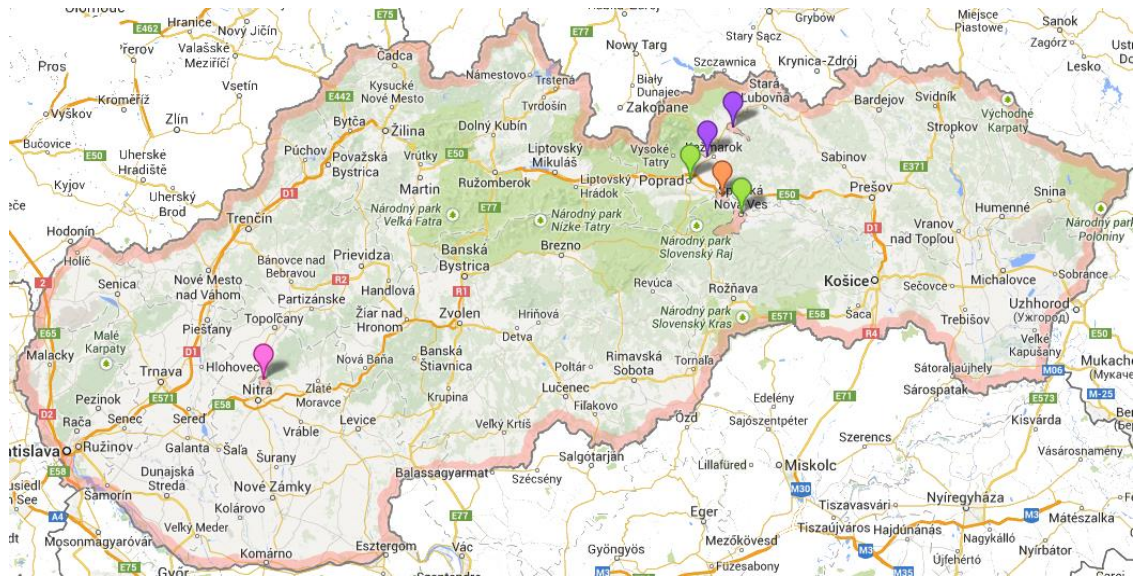

Supplement: ejhg2015181x1.pdf [file ejhg2015181x1.pdf]
