# Supplementary material
Source: PubMed Central journal article supplement (PMC4930088)
Supplement: ejhg2015181x2.pdf [file ejhg2015181x2.pdf]

**Supplementary Table 1 Primers and PCR conditions**  
**Gene *ABCC2***

| Exon  | Primer   | Sequence 5'-3'              | Product size bp | Tm |
|-------|----------|-----------------------------|-----------------|----|
| 1     | DJ1F     | aggtcatcctttacggagaaca      | 209             | 60 |
|       | DJ1R     | tgagtctgagaagagtcaatatgaaga |                 |    |
| 2     | DJ2F     | aaagcagtgggatgtgctg         | 309             | 60 |
|       | DJ2R     | tgtctctactgtgcaccaagg       |                 |    |
| 3     | DJ3F     | tatccatcaccggaaacct         | 310             | 60 |
|       | DJ3R     | atttgttcacccattcca          |                 |    |
| 4+5   | DJ4-5F   | catgttctctgacatccttctcc     | 311             | 60 |
|       | DJ4-5R   | ccgtgagaccagacatctt         |                 |    |
| 6     | DJ6F     | cccataagttcctgtctcc         | 312             | 60 |
|       | DJ6R     | ggcaacaagagcaaaactcc        |                 |    |
| 7     | DJ7F     | gtcccattcttctgtcctct        | 313             | 60 |
|       | DJ7R     | atgccatgatgctgatgta         |                 |    |
| 8     | DJ8F     | gagctgctcaggccagtaac        | 314             | 61 |
|       | DJ8R     | aaaggagggtggcagagga         |                 |    |
| 9     | DJ9F     | gtctagctggctgtgcatga        | 315             | 60 |
|       | DJ9R     | tgaggggattttctttggtg        |                 |    |
| 10    | DJ10F    | tagtatccttggctttgtcc        | 316             | 55 |
|       | DJ10R    | gggtttacactttaagaaagc       |                 |    |
| 11    | DJ11F    | ccctctctcatggaagcgt         | 317             | 60 |
|       | DJ11R    | gagagccactgcttctgtcc        |                 |    |
| 12    | DJ12F    | atacactggtgcccttca          | 318             | 60 |
|       | DJ12R    | cctttcaggaagctgatgc         |                 |    |
| 13    | DJ13F    | tagcacaatgctgcttggtc        | 319             | 60 |
|       | DJ13R    | ctggactccaaggctttaacc       |                 |    |
| 14    | DJ14F    | tctctctgcttgtgctggt         | 320             | 59 |
|       | DJ14R    | gcgaataagttgggaagca         |                 |    |
| 15    | DJ15F    | gtcacgtggggacctacatt        | 321             | 60 |
|       | DJ15R    | aatagggcaggcagtgagaa        |                 |    |
| 16    | DJ16F    | tcaataccaaccctgcta          | 322             | 60 |
|       | DJ16R    | attcgggagtcagaggcttt        |                 |    |
| 17    | DJ17F    | tcctcaaccctgcgtttct         | 323             | 61 |
|       | DJ17R    | cttcaatatgccttcacccttg      |                 |    |
| 18+19 | DJ18-19F | tgtgaaggtggatctagggagt      | 324             | 60 |
|       | DJ18-19R | accatggccaagtctat           |                 |    |
| 20+21 | DJ20-21F | gggatctatgcagctctttcc       | 325             | 60 |
|       | DJ20-21R | tcaaatgctactttctgtgtgg      |                 |    |
| 22+23 | DJ22-23F | ggttggcattctaggtgatcc       | 326             | 59 |
|       | DJ22-23R | cagtgtgtctagggggaca         |                 |    |

|       |          |                         |     |    |
|-------|----------|-------------------------|-----|----|
| 24    | DJ24F    | cctcagtgatgggtatctctcc  | 327 | 60 |
|       | DJ24R    | ggaaagaggctgggcttta     |     |    |
| 25    | DJ25F    | agaaaggaggaagatgggtga   | 328 | 60 |
|       | DJ25R    | aaccccaaagtacacacatgg   |     |    |
| 26    | DJ26F    | gctgggtaagatgaggacgtg   | 329 | 59 |
|       | DJ26R    | aacgaaaccaaactccaac     |     |    |
| 27+28 | DJ27-28F | ccttggtggttgagtgggtg    | 330 | 59 |
|       | DJ27-28R | ctgctctccactctgtccaa    |     |    |
| 29    | DJ29F    | ggctaaataacttttccccaaga | 331 | 60 |
|       | DJ29R    | gcatgtgcccagtaagttc     |     |    |
| 30    | DJ30F    | gaggtccttttctggcatga    | 332 | 60 |
|       | DJ30R    | aacacgaggaacacgaggag    |     |    |
| 31    | DJ31F    | aacacatgggtgcttctattgg  | 333 | 60 |
|       | DJ31R    | aaggggtaagccatccgtgt    |     |    |
| 32    | DJ32F    | gcctagacttgagatgctg     | 334 | 54 |
|       | DJ32R    | cacctattgcatcacca       |     |    |

#### TATAA box of *UGT1A1*

| Primer | Sequence                   | Product | Tm |
|--------|----------------------------|---------|----|
| TATA F | 6FAM-aactccctgctacctttgtgg | 241/243 | 60 |
| TATA R | tccaacagtatctcccagcatggg   |         |    |

#### PCR program

- 1 95°C/2 min
- 2 95°C/30 sec
- 3 Tm°C/40 sec
- 4 72°C/30 sec go to step 2, repeat steps 2-4 30 times
- 5 72°C/30 sec
