# Supplementary material
Source: PubMed Central journal article supplement (PMC4930088)
Supplement: ejhg2015181x3.pdf [file ejhg2015181x3.pdf]

**Supplementary Table 2**

Total and conjugated bilirubin (in  $\mu\text{mol/L}$ ) and genotypes of heterozygotes and healthy individuals

Legend DJS -/- healthy; +/- heterozygote; ++ homozygote for c.1013\_1014delTG in *ABCC2* ;

GS 6/6 healthy, 6/7 heterozygote, 7/7 homozygote for g.175492\_175493insTA in *UGT1A1*

| Family | Genealogy | DJS | GS  | PBREM | cBi  | Tbi  | % cBi of Tbi |
|--------|-----------|-----|-----|-------|------|------|--------------|
| F1     | II/2      | -/- | 6/6 | T/T   | 1.9  | 5.7  | 33.3         |
|        | II/6      | -/- | 6/7 | T/G   | 2.3  | 7.6  | 30.3         |
|        | III/1     | -/- | 6/7 | T/G   | 1.8  | 3.6  | 50.0         |
|        | III/2     | +/- | 6/7 | T/G   | 2.0  | 12.3 | 16.3         |
|        | III/3     | -/- | 6/6 | T/T   | 0.1  | 4.6  | 2.2          |
|        | III/4     | +/- | 6/7 | T/G   | 2.8  | 7.2  | 38.9         |
|        | III/5     | +/- | 6/6 | T/T   | 2.3  | 6.5  | 35.4         |
|        | III/6     | +/- | 6/7 | T/T   | 1.8  | 5.1  | 35.3         |
|        | III/7     | +/- | 6/6 | T/T   | 1.0  | 2.8  | 35.7         |
|        | III/8     | -/- | 6/6 | T/T   | 2.4  | 9.5  | 25.3         |
|        | III/9     | +/- | 6/7 | T/G   | 0.3  | 9.0  | 3.3          |
|        | III/10    | +/- | 6/7 | T/G   | 1.2  | 1.5  | 80.0         |
|        | III/11    | +/- | 6/6 | T/T   | 0.7  | 5.7  | 12.3         |
|        | III/12    | +/- | 6/6 | T/T   | 0.2  | 3.7  | 5.4          |
|        | III/13    | +/- | 6/7 | T/G   | 0.3  | 5.0  | 6.0          |
|        | III/14    | +/- | 6/7 | T/G   | 0.2  | 5.5  | 3.6          |
|        | IV/1      | +/- | 7/7 | G/G   | 1.5  | 6.8  | 22.1         |
|        | IV/2      | -/- | 6/7 | T/G   | 3.0  | 3.8  | 78.9         |
|        | IV/3      | +/- | 6/6 | T/T   | 0.2  | 4.7  | 4.3          |
|        | IV/4      | +/- | 6/7 | T/G   | -    | -    | -            |
| IV/5   | +/-       | 6/7 | T/G | -     | -    | -    |              |
| IV/6   | +/-       | 6/7 | T/G | -     | -    | -    |              |
| IV/7   | +/-       | 6/7 | T/G | -     | -    | -    |              |
| IV/8   | +/-       | 6/7 | T/G | 1.8   | 5.8  | 31.0 |              |
| IV/9   | +/-       | 6/7 | T/G | -     | -    | -    |              |
| IV/10  | -/-       | 6/7 | T/G | 3.0   | 5.5  | 54.5 |              |
| IV/11  | -/-       | 6/7 | T/G | -     | -    | -    |              |
| IV/14  | +/-       | 6/6 | T/T | 1.3   | 4.5  | 28.9 |              |
| IV/15  | +/-       | 6/7 | T/G | 3.2   | 12.7 | 25.2 |              |
| F2     | I/1       | +/- | 7/7 | G/G   | -    | -    | -            |
|        | I/2       | +/- | 6/7 | T/G   | -    | -    | -            |
| F3     | I/1       | +/- | 6/7 | T/G   | -    | -    | -            |
|        | I/2       | +/- | 6/7 | T/G   | -    | -    | -            |
| F2     | I/1       | +/- | 6/7 | G/G   | -    | -    | -            |
|        | I/2       | +/- | 6/7 | G/G   | -    | -    | -            |
|        | II/2      | -/- | 6/7 | T/G   | -    | -    | -            |
| F5     | I/2       | +/- | 6/7 | T/G   | -    | -    | -            |
| F6     | I/1       | +/- | 6/6 | T/T   | -    | -    | -            |
| F7     | I/2       | +/- | 6/6 | T/G   | -    | -    | -            |
