# Supplementary material
Source: PubMed Central journal article supplement (PMC4930088)
Supplement: ejhg2015181x4.pdf [file ejhg2015181x4.pdf]

**Supplementary Table 3**Estimation of age of deletion c.1013\_1014delTG in *ABCC2* in Slovakian Roma

| <b>Population size</b> | <b>Frequency of disease allele</b> | <b>Age (generations)</b> | <b>Age (years)</b>  |
|------------------------|------------------------------------|--------------------------|---------------------|
| 400 000                | 0.01                               | 7.1 (5.9-8.9)            | 177.5 (147.5-222.5) |
| 400 000                | 0.001                              | 7.4 (5.9-9.6)            | 185 (147.5 – 240.0) |
| 450 000                | 0.01                               | 7.1 (5.9-8.9)            | 177.5 (147.5-222.5) |
| 450 000                | 0.001                              | 7.4 (5.9-9.5)            | 185 (147.5 – 237.5) |
